# Supplementary material
Source: PubMed Central journal article supplement (PMC8173473)
Supplement: jama-e217444-s003.pdf [file jama-e217444-s003.pdf]

**Supplementary Online Material: Nonauthor Collaborators**

\*Indicates required information. Only first name, last name, and suffix will appear in PubMed.

| <b>*Group Name(s): The MOBILE Study Group</b> |                   |                              |                  |                                                                                          |                                          |                                                         |                                                                                            |
|-----------------------------------------------|-------------------|------------------------------|------------------|------------------------------------------------------------------------------------------|------------------------------------------|---------------------------------------------------------|--------------------------------------------------------------------------------------------|
| <b>*First Name and Middle Initial(s)</b>      | <b>*Last Name</b> | <b>*Suffix (eg, Jr, III)</b> | Academic Degrees | Institution                                                                              | Location (city, state/province, country) | Role or Contribution, eg, chair, principal investigator | Group (if more than 1 Group listed in the byline) and/or Subgroup (eg, Steering Committee) |
| Anders                                        | Carlson           |                              | MD               | International Diabetes Center, HealthPartners Institute, Park Nicollet Internal Medicine | Minneapolis, Minnesota                   |                                                         |                                                                                            |
| Sharon                                        | Chambers          |                              | MSN, MBA, RN     | International Diabetes Center, HealthPartners Institute, Park Nicollet Internal Medicine | Minneapolis, Minnesota                   |                                                         |                                                                                            |
| Shoua                                         | Yang              |                              | BS               | International Diabetes Center, HealthPartners Institute, Park Nicollet Internal Medicine | Minneapolis, Minnesota                   |                                                         |                                                                                            |
| Marian Sue                                    | Kirkman           |                              | MD               | University of North Carolina School of Medicine                                          | Chapel Hill, North Carolina              |                                                         |                                                                                            |
| Alexander                                     | Kass              |                              | BSN, RN, CDE     | University of North Carolina School of Medicine                                          | Chapel Hill, North Carolina              |                                                         |                                                                                            |
| Rachael                                       | Fraser            |                              |                  | University of North Carolina School of Medicine                                          | Chapel Hill, North Carolina              |                                                         |                                                                                            |
| Terra                                         | Cushman           |                              | RN, BSN, CDE     | Henry Ford Health System                                                                 | Detroit, Michigan                        |                                                         |                                                                                            |
| Clementina                                    | Ramos             |                              | MD               | Emory University School of Medicine at Grady Memorial Hospital                           | Atlanta, Georgia                         |                                                         |                                                                                            |
| Maria                                         | Magar             |                              | MD               | Keck School of Medicine of the University of Southern California                         | Los Angeles, California                  |                                                         |                                                                                            |
| Martha                                        | Walker            |                              | RD, CDCES        | Keck School of Medicine of the University of Southern California                         | Los Angeles, California                  |                                                         |                                                                                            |
| Sara                                          | Serafin-Dokhan    |                              |                  | Keck School of Medicine of the University of Southern California                         | Los Angeles, California                  |                                                         |                                                                                            |
| Maamoun                                       | Salam             |                              | MB               | Washington University School of Medicine                                                 | St. Louis, Missouri                      |                                                         |                                                                                            |
| Stacy                                         | Hurst             |                              | RN, CDE          | Washington University School of Medicine                                                 | St. Louis, Missouri                      |                                                         |                                                                                            |
| Mary Jane                                     | Clifton           |                              | CCRP             | Washington University School of Medicine                                                 | St. Louis, Missouri                      |                                                         |                                                                                            |
| Jelena                                        | Kravarusic        |                              | MD, PhD          | Feinberg School of Medicine, Northwestern University                                     | Chicago, Illinois                        |                                                         |                                                                                            |
| Anupam                                        | Bansal            |                              | MD               | Feinberg School of Medicine, Northwestern University                                     | Chicago, Illinois                        |                                                         |                                                                                            |
| Candice                                       | Fulkerson         |                              | RN               | Feinberg School of Medicine, Northwestern University                                     | Chicago, Illinois                        |                                                         |                                                                                            |
| Lynn                                          | Ang               |                              | MD               | University of Michigan                                                                   | Ann Arbor, Michigan                      |                                                         |                                                                                            |
| Caroline                                      | Richardson        |                              | MD               | University of Michigan                                                                   | Ann Arbor, Michigan                      |                                                         |                                                                                            |
| Kara                                          | Mizokami-Stout    |                              | MD               | University of Michigan                                                                   | Ann Arbor, Michigan                      |                                                         |                                                                                            |
| Jake                                          | Reiss             |                              |                  | University of Michigan                                                                   | Ann Arbor, Michigan                      |                                                         |                                                                                            |
| Virginia                                      | Leone             |                              |                  | University of Michigan                                                                   | Ann Arbor, Michigan                      |                                                         |                                                                                            |
| Kirstie                                       | Stifel            |                              | CRC              | Iowa Diabetes Research                                                                   | West Des Moines, Iowa                    |                                                         |                                                                                            |
| George                                        | Dailey            |                              | MD               | Scripps Whittier Diabetes Institute                                                      | San Diego, California                    |                                                         |                                                                                            |
| Amy                                           | Change            |                              | MD               | Scripps Whittier Diabetes Institute                                                      | San Diego, California                    |                                                         |                                                                                            |
| James                                         | McCallum          |                              | MD               | Scripps Whittier Diabetes Institute                                                      | San Diego, California                    |                                                         |                                                                                            |
| Maria Isabel                                  | Garcia            |                              | RN               | Scripps Whittier Diabetes Institute                                                      | San Diego, California                    |                                                         |                                                                                            |
| Dianne                                        | Davis             |                              | RD, LDN, CDE     | Vanderbilt University Medical Center                                                     | Nashville, Tennessee                     |                                                         |                                                                                            |
| Cynthia                                       | Lovell            |                              | LPN              | Vanderbilt University Medical Center                                                     | Nashville, Tennessee                     |                                                         |                                                                                            |
| Connie                                        | Root              |                              | APRN             | Vanderbilt University Medical Center                                                     | Nashville, Tennessee                     |                                                         |                                                                                            |
| Freida                                        | Toler             |                              | RN, FNP          | Amarillo Medical Specialists                                                             | Amarillo, Texas                          |                                                         |                                                                                            |
| Lori                                          | Wilhelm           |                              | RN, FNP          | Amarillo Medical Specialists                                                             | Amarillo, Texas                          |                                                         |                                                                                            |
| Robin                                         | Eifert            |                              |                  | Amarillo Medical Specialists                                                             | Amarillo, Texas                          |                                                         |                                                                                            |
| Lorena                                        | Murguia           |                              |                  | Amarillo Medical Specialists                                                             | Amarillo, Texas                          |                                                         |                                                                                            |
| Becky                                         | Cota              |                              | RN, CDE          | Amarillo Medical Specialists                                                             | Amarillo, Texas                          |                                                         |                                                                                            |
| Loida                                         | Nguyen            |                              | PharmD, BCPS     | Las Vegas Endocrinology                                                                  | Henderson, Nevada                        |                                                         |                                                                                            |
| Randie                                        | Lipski            |                              | CRT              | Las Vegas Endocrinology                                                                  | Henderson, Nevada                        |                                                         |                                                                                            |
| Mary Katherine                                | Lawrence          |                              | MD               | Carteret Medical Group                                                                   | Morehead City, North Carolina            |                                                         |                                                                                            |
| Adelle                                        | Fournier          |                              | CCRC             | Carteret Medical Group                                                                   | Morehead City, North Carolina            |                                                         |                                                                                            |

**Supplementary Online Material: Nonauthor Collaborators**

\*Indicates required information. Only first name, last name, and suffix will appear in PubMed.

| *First Name and Middle Initial(s) | *Last Name | *Suffix (eg, Jr, III) | Academic Degrees | Institution                            | Location (city, state/province, country) | Role or Contribution, eg, chair, principal investigator | Group (if more than 1 Group listed in the byline) and/or Subgroup (eg, Steering Committee) |
|-----------------------------------|------------|-----------------------|------------------|----------------------------------------|------------------------------------------|---------------------------------------------------------|--------------------------------------------------------------------------------------------|
| Matthew                           | Carter     |                       | CCRC             | Carteret Medical Group                 | Morehead City, North Carolina            |                                                         |                                                                                            |
| Stephanie                         | Hoover     |                       | CRC              | Diabetes and Endocrinology Consultants | Morehead City, North Carolina            |                                                         |                                                                                            |
| Nathan                            | Cohen      |                       | MS               | Jaeb Center for Health Research        | Tampa, Florida                           |                                                         |                                                                                            |
| Thomas                            | Mouse      |                       |                  | Jaeb Center for Health Research        | Tampa, Florida                           |                                                         |                                                                                            |
| Jessica                           | Rusnak     |                       |                  | Jaeb Center for Health Research        | Tampa, Florida                           |                                                         |                                                                                            |
| Tiffany                           | Campos     |                       |                  | Jaeb Center for Health Research        | Tampa, Florida                           |                                                         |                                                                                            |
| Nelly                             | Njeru      |                       |                  | Dexcom, Inc.                           | San Diego, California                    |                                                         |                                                                                            |
| Tom                               | Arant      |                       |                  | Dexcom, Inc.                           | San Diego, California                    |                                                         |                                                                                            |
| Stayce E.                         | Beck       |                       | PhD, MPH         | Dexcom, Inc.                           | San Diego, California                    |                                                         |                                                                                            |
| Andrew                            | Balo       |                       |                  | Dexcom, Inc.                           | San Diego, California                    |                                                         |                                                                                            |
