# Supplementary material
Source: PubMed Central journal article supplement (PMC8173473)
Supplement: jama-e217444-s004.pdf [file jama-e217444-s004.pdf]

## Data Sharing Statement

Martens. Effect of Continuous Glucose Monitoring on Glycemic Control in Patients With Type 2 Diabetes Treated With Basal Insulin. *JAMA*. Published June 02, 2021. doi:10.1001/jama.2021.7444

### Data

**Data available:** Yes

**Data types:** Deidentified participant data

**How to access data:** A documented, de-identified dataset may be provided to other researchers upon submitting a request to the corresponding author that describes the data requested and the purpose for its use.

**When available:** With publication

### Supporting Documents

**Document types:** None

### Additional Information

**Who can access the data:** Researchers whose proposed use of the data has been approved.

**Types of analyses:** Purpose specified by author group.

**Mechanisms of data availability:** Without investigator support.
